# Supplementary material for: The Contribution of Submarine Optical Fiber Telecom Cables to the Monitoring of Earthquakes and Tsunamis in the NE Atlantic
Source: Frontiers journal article supplement (doi:10.3389/feart.2021.686296), 2021-07-20
Supplement: Data_Sheet_1.PDF [file Data_Sheet_1.PDF]

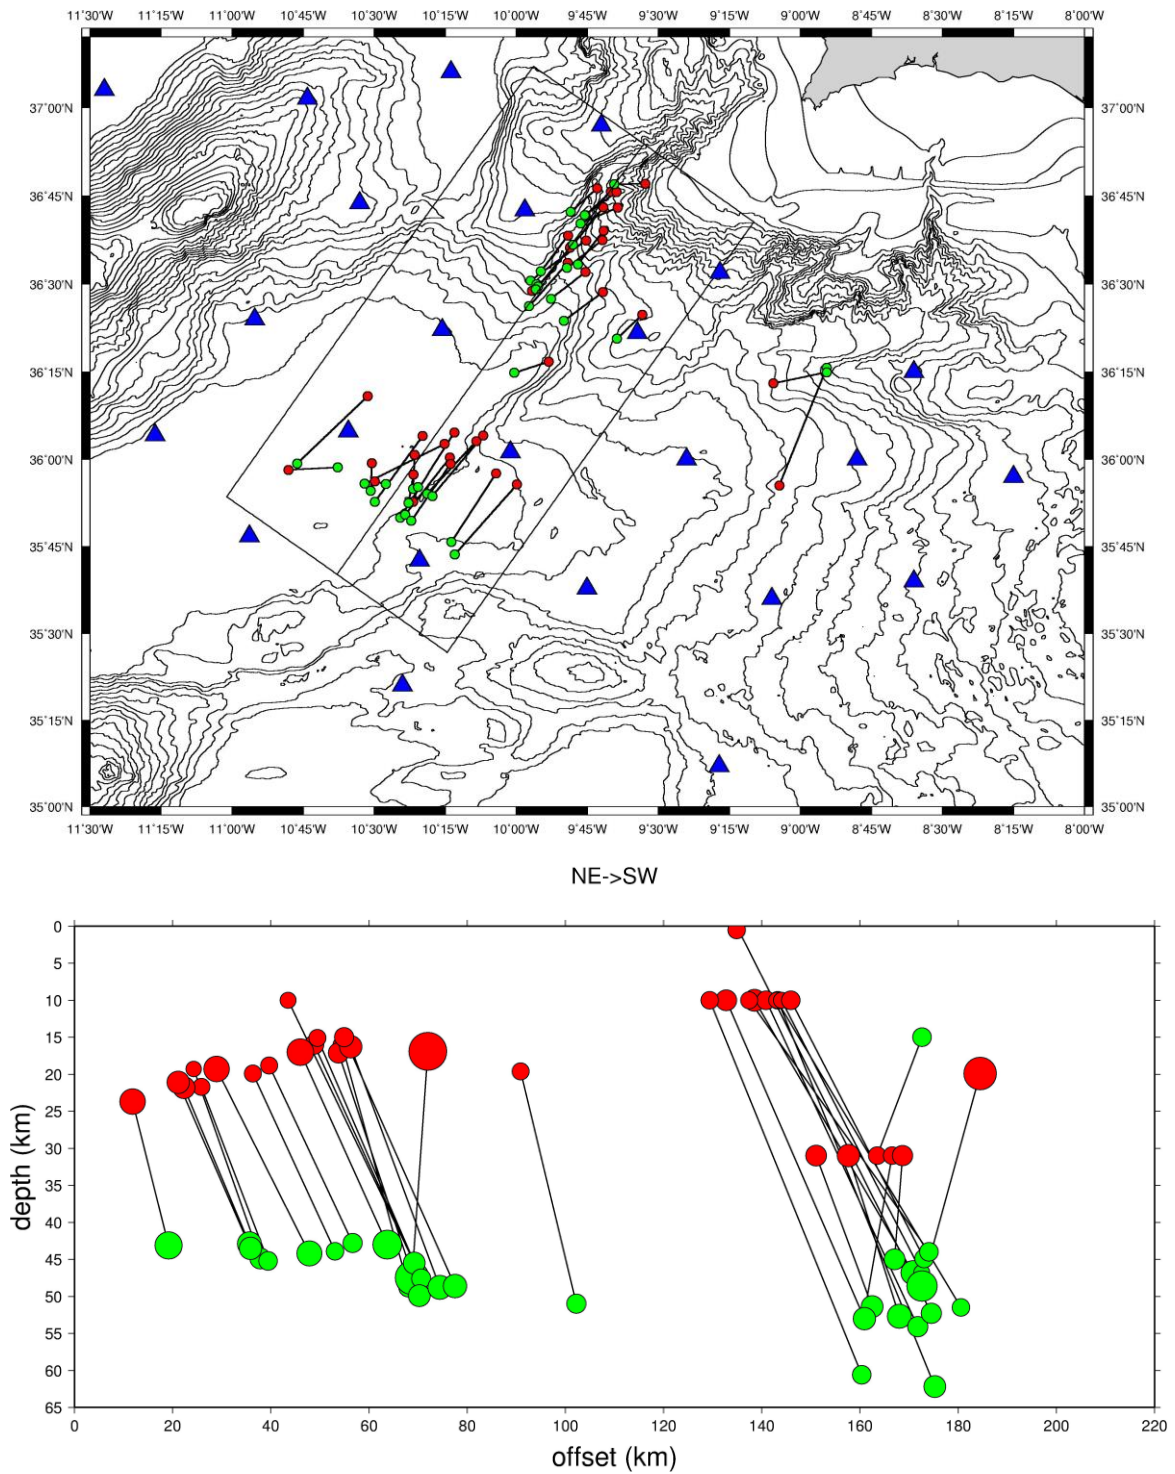

Figure SUPP1 – a) Comparison of the epicenter locations obtained by land network (red dots) with the locations obtained by the OBS NEAREST network (green dots). Original and relocated epicenters are connect by black lines. Blue triangles show the OBS locations. The black rectangle shows the data selection for the depth profile shown in (b). b) Focal depth profile for the data selected in the rectangle shown in (a). Circle size is proportional to the magnitude, color is the same as in (a). Data extracted from Geissler et al. (2010).
